# Supplementary material for: Standardized mounting method of (zebrafish) embryos using a 3D-printed stamp for high-content, semi-automated confocal imaging
Source: BMC Biotechnol. 2019 Oct 22;19:68. doi: 10.1186/s12896-019-0558-y (PMC6805687; doi:10.1186/s12896-019-0558-y)
Supplement: Supplementary file 3 — : Additional file 3: Dataset S3. Multi-point coordinates. Single coordinates represent the centre of each respective organ in X, Y and Z as perceived by using cldnb:lyn-gfp transgenic embryos. The data is provided as ‘.xml’ files, the native points-list data format of NIS-Elements. To parse the files and process the data R was used [34] [35]. The documentation with appropriate code comments is presented as ‘.html and ‘. Rmd’ files. [file 12896_2019_558_MOESM3_ESM.zip]

Archive with 3 entries (3 files):
- 180206_pllp_multipoints.xml
- 180526_eye_multipoints.xml
- 180526_ov_multipoints.xml
